1 **Association of Free Triiodothyronine with Long-Term Prognosis in Hypertrophic**  
2 **cardiomyopathy patients with HFpEF: A Dual center research study**

3 Xiangbin Meng<sup>1\*</sup>; Jing-Jia Wang<sup>1\*</sup>; Jun Gao<sup>1\*</sup>; Kuo Zhang<sup>2\*</sup>; Wen Jun<sup>2</sup>; Xu-Liang Wang<sup>1</sup>;  
4 Yuan-Geng-Shuo Wang<sup>1</sup>; Ji-Lin Zheng<sup>2</sup>; Yu-Peng Liu<sup>3</sup>; Jing-Jing Song<sup>2</sup>; Jie Yang<sup>1</sup>; Yi-Tian  
5 Zheng<sup>1</sup>; Chen Li<sup>1</sup>; Wen-Yao Wang<sup>1#</sup>; Chunli Shao<sup>1#</sup>; Yi-Da Tang<sup>1#</sup>

6 <sup>1</sup>Department of Cardiology and Institute of Vascular Medicine, Peking University Third  
7 Hospital, Key Laboratory of Molecular Cardiovascular Science, Ministry of Education,  
8 Beijing, China.

9 <sup>2</sup>Department of Cardiology, State Key Laboratory of Cardiovascular Disease, Fuwai Hospital,  
10 National Center for Cardiovascular Diseases, Chinese Academy of Medical Sciences and  
11 Peking Union Medical College, Beijing 100037, China.

12 <sup>3</sup>Department of Cardiology, Guangdong Provincial People's Hospital (Guangdong Academy  
13 of Medical Sciences), Southern Medical University, Guangzhou, China

14 \* These authors contributed equally to this study.

15 ***Corresponding to: Yi-Da Tang, MD, PhD, Chunli Shao, MD, PhD, and Wen-Yao Wang***

16 ***MD, PhD***

17 ***Abbreviated Title:*** Free T3 and Prognosis in HCM Patients with HFpEF: A Dual Center Study

18 ***Key words:*** HFpEF, prognosis, FT3 levels, prognostic factors, all-cause mortality and cardiac  
19 transplantation.

20 ***Word count:*** 198 (abstract); 3501 (excluding abstract, figure legends, and references)

21 ***Number of figures and tables:*** 5

22 ***Conflict of interest statement***

23 The authors have no potential conflict of interest to declare.

24 **Corresponding to: Yi-Da Tang, MD, PhD, Chunli Shao, MD, PhD, and Wen-Yao Wang,**

25 **MD, PhD**

26 **Yi-Da Tang, MD, PhD,** Department of Cardiology and Institute of Vascular Medicine, Peking

27 University Third Hospital; Key Laboratory of Molecular Cardiovascular Science, Ministry of

28 Education, Beijing, China. No.49 Huayuanbei Road, Beijing 100191, China (Email:

29 [tangyida@bjmu.edu.cn](mailto:tangyida@bjmu.edu.cn)).

30 **Chunli Shao, MD, PhD,** Department of Cardiology and Institute of Vascular Medicine, Peking

31 University Third Hospital; Key Laboratory of Molecular Cardiovascular Science, Ministry of

32 Education, Beijing, China. No.49 Huayuanbei Road, Beijing 100191, China (Email:

33 [chunlishao@126.com](mailto:chunlishao@126.com)).

34 **Wen-Yao Wang, MD, PhD,** Department of Cardiology and Institute of Vascular Medicine,

35 Peking University Third Hospital; Key Laboratory of Molecular Cardiovascular Science,

36 Ministry of Education, Beijing, China. No.49 Huayuanbei Road, Beijing 100191, China (Email:

37 [wangwy@bjmu.edu.cn](mailto:wangwy@bjmu.edu.cn)).

38

39

40

41

42

43

44

45

46 **Abstract**

47 **Objective:** The objective of this study was to identify prognostic factors in Hypertrophic  
48 cardiomyopathy patients with HFpEF, with a particular focus on the role of FT3 levels.

49 **Research Design and Methods:** We conducted a retrospective cohort study of 992 patients  
50 with HFpEF who were admitted to our two medical centers between 2009 and 2019. We  
51 collected demographic and clinical data, including FT3 levels, and conducted univariate and  
52 multivariate Cox analyses, KM survival curve analysis, and RSC curve analysis to identify  
53 prognostic factors and evaluate the non-linear predictive value of FT3.

54 **Results:** We found that age, atrial fibrillation, and NT-proBNP levels were all significant  
55 prognostic factors in patients with heart failure. Additionally, FT3 levels were a significant  
56 independent predictor of all-cause mortality and cardiac transplantation. Patients with lower  
57 FT3 levels had worse long-term prognoses, and the critical value of FT3 was 2.885.

58 **Conclusions:** Our findings suggest that FT3 levels are an important prognostic factor in  
59 patients with heart failure and should be considered when evaluating patient outcomes.  
60 Clinicians should monitor FT3 levels and consider interventions to maintain or improve  
61 thyroid function in patients with heart failure.

62 **Key words:** heart failure, prognosis, FT3 levels, prognostic factors, all-cause mortality,  
63 cardiac transplantation

64 **Article Highlights:**

65 • FT3 levels are a significant independent predictor of all-cause mortality and cardiac  
66 transplantation in Hypertrophic cardiomyopathy patients with HFpEF

67 • Patients with hypertrophic cardiomyopathy combined with HFpEF have a poorer

- 68 long-term prognosis with lower FT3 levels, with a critical FT3 value of 2.885
- 69 • Age, atrial fibrillation, and NT-proBNP levels were also significant prognostic factors in
- 70 Hypertrophic cardiomyopathy patients with HFpEF
- 71 • Clinicians should monitor FT3 levels and consider interventions to maintain or improve
- 72 thyroid function in Hypertrophic cardiomyopathy patients with HFpEF.

73 **1.Introduction**

74 Heart failure (HF) is a chronic and progressive condition in which the heart is unable to pump  
75 enough blood to meet the body's needs. It is a major cause of morbidity and mortality  
76 worldwide, with an estimated prevalence of 1-2% in the general population. The prognosis of  
77 HF is highly variable, and identifying prognostic factors is critical for guiding clinical  
78 decision-making and improving patient outcomes. The importance of identifying prognostic  
79 factors in HF cannot be overstated. Such factors can help clinicians stratify patients according  
80 to their risk of adverse outcomes, tailor treatment plans to individual patients, and monitor  
81 disease progression over time. However, despite extensive research in this area, there is still a  
82 need to identify new prognostic markers that can improve risk prediction and guide treatment  
83 decisions.

84 HF with preserved ejection fraction (HFpEF) is a specific type of HF in which the ejection  
85 fraction, or the percentage of blood that is pumped out of the heart with each beat, is normal  
86 or only slightly reduced. Patients with HFpEF typically present with symptoms such as  
87 shortness of breath, fatigue, and exercise intolerance, and the prevalence of HFpEF is  
88 increasing due to the aging population and the high prevalence of comorbidities such as  
89 hypertension and diabetes.

90 Hypertrophic cardiomyopathy (HCM) is a genetic disorder characterized by abnormal  
91 thickening of the heart muscle, which can lead to various clinical manifestations including  
92 arrhythmias, heart failure, and sudden cardiac death. Previous studies have shown that the  
93 prevalence of HFpEF is high in patients with HCM, and HFpEF has been shown to be an  
94 independent predictor of adverse outcomes in this population.

95 Thyroid hormones are known to have important effects on the cardiovascular system,  
96 including the regulation of heart rate, contractility, and vascular tone. Thyroid hormone  
97 profile acts as a fundamental regulator in cardiovascular homeostasis in both physiological  
98 conditions and pathological processes <sup>[1,2]</sup>. Abnormal thyroid hormone levels, such as  
99 hypothyroidism or hyperthyroidism, have been associated with various cardiovascular  
100 diseases including HF. Our previous study, together with other clinical evidence, indicated  
101 that thyroid hormone levels, particularly the level of free triiodothyronine (FT3), correlate  
102 with exacerbated cardiac function <sup>[3-6]</sup> and hypothyroid status was an independent risk factor  
103 of adverse events in patients with cardiovascular diseases. The potential mechanism  
104 underlying the influence of thyroid hormone levels on cardiovascular disease involves the  
105 regulation of gene expression and signaling pathways involved in cardiac hypertrophy,  
106 fibrosis, and inflammation<sup>[7,8]</sup>. FT3 is a thyroid hormone that plays a critical role in regulating  
107 cardiac function, and previous studies have suggested that low FT3 levels are associated with  
108 poor outcomes in patients with HF<sup>[8]</sup>. However, the relationship between FT3 and prognosis  
109 of patients with HCM and HFpEF is still not well understood, and further research is needed  
110 to elucidate this relationship and identify optimal cutoff values for risk stratification.

111 Given the high prevalence of HFpEF in patients with HCM and the potential role of thyroid  
112 hormones in cardiovascular disease, there is a need to identify diagnostic factors that may  
113 help predict outcomes in this population. In this study, we aimed to investigate the prognostic  
114 value of thyroid hormone levels in patients with HCM and HFpEF, and to explore the  
115 potential mechanism underlying this association.

## 116 **2. Research Design and Methods**

## 117 **2.1 Ethics statement**

118 The study was in accordance with the ethical guidelines of the declaration of Helsinki and  
119 China's regulations and guidelines on good clinical practice and was approved by the Ethics  
120 Committee of the Peking University Third Hospital. Before the start of the study, we received  
121 written informed consents from all participants.

## 122 **2.2 Design, patients, and outcome measure**

### 123 **2.2.1 Study Patients**

124 This study was a two-center, retrospective cohort study. All patients in this study were  
125 evaluated at two medical centers: the Peking University Third Hospital, and Fuwai Hospital  
126 (National Center of Cardiovascular Diseases, China). Between October 1, 2009, and  
127 December 31, 2019, a total of 2802 patients (age $\geq$ 16 years) were diagnosed with HOCM.  
128 Among them, 187 patients with EF<50% were excluded from this study. In the end, 992  
129 patients with hypertrophic cardiomyopathy diagnosed with HFpEF were included in this study.  
130 Patients were divided into three groups according to the FT3 levels: Tertile 1: (FT3<2.77  
131 pg/mL, n=336), Tertile 2 : (2.77 pg/mL $\leq$  FT3  $\leq$  3.09 pg/mL, n=335), Tertile 3 (FT3>3.10  
132 pg/mL, n=321).

### 133 **2.2.2 Diagnosis of HOCM**

134 The diagnosis of HOCM was based on <sup>[9-11]</sup>: 1, wall thickness  $\geq$ 15 mm in one or more LV  
135 myocardial segments, as measured by any imaging technique (echocardiography, cardiac  
136 magnetic resonance imaging, or computed tomography); 2, wall thickness (13-14mm) with  
137 family history, non-cardiac symptoms and signs, electrocardiogram(ECG) abnormalities,  
138 laboratory tests, and multi-modality cardiac imaging; 3, patients with LV outflow tract

139 obstruction (LVOTO) were based on: dynamic LVOT obstruction due to systolic anterior  
140 motion of the mitral valve, with an LVOT gradient  $\geq 30$  mmHg at rest or during physiological  
141 provocation such as Valsalva maneuver, standing, and exercise. Significant dynamic LVOT  
142 obstruction was documented by 2-dimensional and Doppler echocardiography or, in those  
143 cases where echocardiography was insufficient, by invasive hemodynamic catheterization  
144 with provocation.

### 145 **2.2.3 Diagnosis of HFpEF**

146 In our study, the diagnosis of HFpEF was determined by evaluating a combination of  
147 symptoms, signs, left ventricular ejection fraction (LVEF), and concentrations of NT-proBNP.  
148 Specifically, we followed the 2017 American Heart Association (AHA) criteria for  
149 diagnosis<sup>[12]</sup>, which categorizes patients with LVEF  $\geq 50\%$ , NT-proBNP  $\geq 800$  pg/mL, and  
150 symptoms or signs of heart failure as having HFpEF. Those who did not meet these criteria  
151 were classified as non-HF.

### 152 **2.2.4 Thyroid function test**

153 Thyroid function was assessed after heart failure symptoms were controlled with regular oral  
154 medication prior to discharge, rather than during the acute phase. The thyroid function test  
155 was conducted at a median of 10 days after hospital admission. Blood samples were drawn  
156 after a 12-hour fast and the serum levels of thyroid hormone and thyroid stimulating hormone  
157 were measured using radioimmunoassay (Immulite 2000; Siemens, Germany).

### 158 **2.3 Follow-up and endpoints.**

159 Follow-up started at the time of the patient's first clinic contact after October 1, 2009. At  
160 baseline, all patients were evaluated for the following characteristics: age, sex, NYHA



161 functional class, maximum left ventricular wall thickness (LVWT), maximum (Provo cable)  
162 LVOT gradient, left ventricular function, atrial fibrillation, and conventional risk factors for  
163 cardiac death.

164 The primary endpoints of this study were all-cause mortality and cardiac transplantation  
165 during long-term follow-up. Mortality and adverse events were retrieved from hospital patient  
166 records at the center where follow-up occurred, from civil service population registers, and  
167 information provided by patients themselves and/or their general practitioners. Patients lost to  
168 follow-up were censored upon the last contact with them. If no events occurred during  
169 follow-up, the administrative censoring date was set for December 31, 2019.

#### 170 **2.4 Data Analysis**

171 Statistical analysis was assessed with SPSS 27.0 statistical package for Windows, and R  
172 software version 4.2.2 (R Foundation for Statistical Computing). All continuous variables are  
173 presented as means  $\pm$  SD and analysis of variance was used to compare means across multiple  
174 groups. The relationships between parametric variables were assessed by multiple linear  
175 regression analysis. Initial differences in baseline characteristics between achieved treatment  
176 groups were sought in bivariable analysis by using  $\chi^2$  tests, Fisher exact tests, Student *t* tests,  
177 and Kruskal-Wallis analysis of variance. Cox proportional hazards model was used to  
178 estimate the hazard ratio (HR). Kaplan-Meier analysis was used to study the cumulative  
179 survival of different groups. A P-value less than 0.05 was considered statistically significant.

180 Restricted cubic spline (RCS) is a statistical method used to model nonlinear relationships  
181 between a continuous predictor variable and an outcome variable. It is an extension of the  
182 linear regression model and allows for flexible modeling of the relationship by using cubic

183 polynomial functions. In our study, we use the RCS method provides a flexible and powerful  
184 way to model nonlinear relationships in R. We chose to use four knots, placed at the 10th,  
185 50th, and 90th percentiles of the distribution of FT3 in our study population, to allow for a  
186 flexible yet parsimonious modeling of the non-linear relationship between FT3 and  
187 cardiovascular events. We assessed the overall fit of the model using the likelihood ratio test  
188 and examined the shape of the spline function using graphical displays.

### 189 **2.5 Data and Resource Availability Statement**

190 The datasets generated during and/or analyzed in the current study are available from the  
191 corresponding author upon reasonable request.

### 192 **3.Results**

193 The study population consisted of 992 HCM patients with HFpEF, with an average age of  
194  $53.60 \pm 13.83$  years. The majority of patients were male (58.2%). Atrial fibrillation was present  
195 in 22.5% of patients, while 21.0% had unexplained syncope. The mean NT-proBNP level was  
196  $2278.18 \pm 1743.44$  fmol/mL, and the mean FT3 level was  $2.94 \pm 0.58$  pg/mL.

197 Table 1. It shows the baseline clinical characteristics of the study population divided into the  
198 three tertiles based on the level of FT3. The total number of participants in the study was 992,  
199 with Tertile 1 having 336 participants, Tertile 2 having 335 participants, and Tertile 3 having  
200 321 participants. The mean age of the total population was  $53.60 \pm 13.83$  years, with Tertile 1  
201 being the oldest at  $57.21 \pm 13.84$  years and Tertile 3 being the youngest at  $50.00 \pm 13.49$  years  
202 ( $p < 0.001$ ). Male participants made up the majority of the study population at 58.2%, with  
203 Tertile 3 having the highest proportion of male participants at 76.0% ( $p < 0.001$ ). There were  
204 no significant differences in body mass index (BMI), systolic and diastolic blood pressures,

205 and LV end-diastolic diameter among the three tertiles. However, participants in Tertile 3 had  
206 a significantly higher level of FT3 than those in Tertile 1 and Tertile 2 ( $p < 0.001$ ). Regarding  
207 comorbidities, atrial fibrillation was more prevalent in Tertile 3 than in Tertile 1 and Tertile 2  
208 ( $p < 0.001$ ). On the other hand, NYHA Class III or IV was more common in Tertile 1 than in  
209 Tertile 2 and Tertile 3 ( $p < 0.001$ ). In terms of medications, the use of beta-blockers,  
210 ACEI/ARB, diuretics, and calcium antagonists did not differ significantly among the three  
211 tertiles.

212 Table 2 shows the results of the univariate Cox analysis for all-cause mortality and cardiac  
213 transplantation. The hazard ratios (HR) and 95% confidence intervals (CI) are reported for  
214 each variable, along with the corresponding p-value. The results indicate that higher levels of  
215 FT3 are associated with a lower risk of all-cause mortality and cardiac transplantation, with a  
216 HR of 0.206 and a p-value of less than 0.001. Older age is associated with a higher risk of  
217 mortality and transplantation, with a HR of 1.085 and a p-value of less than 0.001. Male  
218 gender does not appear to be significantly associated with the risk of mortality and  
219 transplantation, with a HR of 0.593 and a p-value of 0.108. Higher levels of NT-proBNP are  
220 associated with a higher risk of mortality and transplantation, with a HR of 1.026 and a  
221 p-value of less than 0.001. A history of atrial fibrillation is associated with a significantly  
222 higher risk of mortality and transplantation, with a HR of 4.240 and a p-value of less than  
223 0.001. A history of unexplained syncope does not appear to be significantly associated with  
224 the risk of mortality and transplantation, with a HR of 1.460 and a p-value of 0.287. The  
225 interventricular septal thickness does not appear to be significantly associated with the risk of  
226 mortality and transplantation, with a HR of 1.001 and a p-value of 0.979.

227 In Table 3, two different models are presented: Model 1 and Model 2. Both models are  
228 multivariate Cox regression models that examine the association between various factors and  
229 all-cause mortality and cardiac transplantation. In Model 1, the factors included age, atrial  
230 fibrillation, NT-proBNP (per 100 fmol/mL), and FT3 (pg/mL). The hazard ratio (HR) for age  
231 was 1.062 (95% CI: 1.029, 1.096), indicating that for every one year increase in age, the risk  
232 of all-cause mortality and cardiac transplantation increased by 6.2%. The HR for atrial  
233 fibrillation was 2.142 (95% CI: 1.084, 4.234), indicating that patients with atrial fibrillation  
234 had a 2.1 times higher risk of all-cause mortality and cardiac transplantation compared to  
235 those without atrial fibrillation. The HR for NT-proBNP was 1.021 (95% CI: 1.007, 1.035),  
236 indicating that for every 100 fmol/mL increase in NT-proBNP, the risk of all-cause mortality  
237 and cardiac transplantation increased by 2.1%. The HR for FT3 was 0.374 (95% CI: 0.178,  
238 0.788), indicating that for every 1 pg/mL increase in FT3, the risk of all-cause mortality and  
239 cardiac transplantation decreased by 62.6%. In Model 2, the same factors were included as in  
240 Model 1, but FT3 was analyzed as a categorical variable (tertiles). The reference group was  
241 FT3 Tertial 3, and the HR for FT3 Tertial 2 was 0.480 (95% CI: 0.214, 1.074), indicating that  
242 patients in the second tertile of FT3 levels had a 52.0% lower risk of all-cause mortality and  
243 cardiac transplantation compared to those in the reference group. The HR for FT3 Tertial 1  
244 was 0.336 (95% CI: 0.114, 0.988), indicating that patients in the first tertile of FT3 levels had  
245 a 66.4% lower risk of all-cause mortality and cardiac transplantation compared to those in the  
246 reference group. In addition, the HR for age, atrial fibrillation, and NT-proBNP remained  
247 significant in Model 2. The HR for age was 1.040 (95% CI: 1.002, 1.079), indicating that for  
248 every one year increase in age, the risk of all-cause mortality and cardiac transplantation

249 increased by 4.0%. The HR for atrial fibrillation was 3.399 (95% CI: 1.356, 8.517), indicating  
250 that patients with atrial fibrillation had a 3.4 times higher risk of all-cause mortality and  
251 cardiac transplantation compared to those without atrial fibrillation. The HR for NT-proBNP  
252 was 1.023 (95% CI: 1.005, 1.041), indicating that for every 100 fmol/mL increase in  
253 NT-proBNP, the risk of all-cause mortality and cardiac transplantation increased by 2.3%.

254 In Fig1, based on the KM survival curve, it seems that Group 1 had the worst long-term  
255 prognosis, and there was a statistically significant difference in prognosis among the three  
256 groups (log-rank test,  $p < 0.001$ ). It is important to note that the KM survival curve is a  
257 graphical representation of the survival probability over time, and it allows for the  
258 comparison of survival between different groups. In this case, it appears that patients with  
259 lower FT3 levels had a worse prognosis than those with higher FT3 levels.

260 In Fig2, we used restricted cubic splines to model the relationship between the FT3 and the  
261 risk of cardiovascular events. We chose to use four knots, placed at the 10th, 50th, and 90th  
262 percentiles of the distribution of the FT3 in our study population, to allow for flexible yet  
263 parsimonious modeling of the non-linear relationship between the FT3 and cardiovascular  
264 events. We assessed the overall fit of the model using the likelihood ratio test and examined  
265 the shape of the spline function using graphical displays. The RSC curve analysis showed a  
266 non-linear relationship between FT3 levels and prognosis. The RSC curve analysis revealed  
267 an "L" shape, indicating that as the FT3 level decreased, the prognosis of the patient gradually  
268 deteriorated. The critical value of FT3 was 2.885 pg/mL.

#### 269 **4. Discussion**

270 Summary of the main findings This study investigated the prognostic value of FT3 in

271 Hypertrophic cardiomyopathy patients with HFpEF. The study found that lower FT3 levels  
272 were associated with a higher risk of all-cause mortality and cardiac transplantation. The  
273 multivariate analysis showed that FT3 was an independent prognostic factor after adjusting  
274 for other clinical factors. The KM survival curve analysis showed that patients with lower  
275 FT3 levels had worse long-term prognosis. Additionally, the RSC curve analysis showed an  
276 "L" shaped relationship between FT3 levels and prognosis, with a critical value of  
277 FT3=2.885.

278       Comparison with previous studies Our findings are consistent with previous studies that  
279 have reported an association between low FT3 levels and poor outcomes in patients with heart  
280 failure<sup>[13,14]</sup>. However, our study is unique in that it used a large sample size, included various  
281 clinical factors in the analysis, and used RSC curve analysis to explore the non-linear  
282 relationship between FT3 and prognosis.

283       Interpretation of the results the results suggest that FT3 is a valuable prognostic factor  
284 for patients with heart failure. Lower FT3 levels are associated with worse outcomes and may  
285 be used to identify high-risk patients who require closer monitoring and more aggressive  
286 treatment. The non-linear relationship between FT3 and prognosis suggests that a critical  
287 value of FT3 may exist, below which the risk of adverse outcomes significantly increases.

288       Clinical implications and potential applications the identification of FT3 as a prognostic  
289 factor has important clinical implications for the management of heart failure. Clinicians  
290 should consider measuring FT3 levels in patients with heart failure to assess their risk of  
291 adverse outcomes. Additionally, our findings suggest that interventions to optimize FT3 levels  
292 may improve the prognosis of patients with heart failure.

293           There is growing evidence suggesting that thyroid hormones play a critical role in  
294 regulating cardiovascular function. In particular, thyroid hormone deficiency, also known as  
295 hypothyroidism, has been associated with a variety of cardiovascular diseases, including heart  
296 failure. Conversely, excess thyroid hormone, or hyperthyroidism, has also been linked to  
297 adverse cardiovascular outcomes, such as atrial fibrillation and sudden cardiac death.

298           The exact mechanisms by which thyroid hormones influence cardiovascular function are  
299 complex and not fully understood. It is known that thyroid hormones affect almost every  
300 aspect of cardiac function, including cardiac contractility, heart rate, and rhythm, as well as  
301 the structure and function of the blood vessels<sup>[15,16]</sup>. Thyroid hormones also have profound  
302 effects on the metabolism of lipids and carbohydrates, which can further impact  
303 cardiovascular health<sup>[17]</sup>.

304           One of the proposed mechanisms by which thyroid hormones affect the prognosis of  
305 heart failure is through their influence on the sympathetic nervous system<sup>[18]</sup>. Thyroid  
306 hormones are known to enhance sympathetic activity, which can increase heart rate and blood  
307 pressure, as well as promote cardiac hypertrophy and remodeling. These changes can  
308 ultimately lead to the development and progression of heart failure<sup>[19]</sup>.

309           Another possible mechanism is the effect of thyroid hormones on the  
310 renin-angiotensin-aldosterone system (RAAS), which is a key regulator of blood pressure and  
311 fluid balance in the body<sup>[18]</sup>. Thyroid hormones have been shown to stimulate the RAAS,  
312 which can lead to sodium and water retention and exacerbate the symptoms of heart failure.

313           In addition, thyroid hormones have been shown to directly affect the expression of genes  
314 involved in cardiac remodeling and fibrosis. In particular, excess thyroid hormone has been

315 associated with increased expression of genes involved in collagen synthesis and deposition,  
316 which can lead to the development of myocardial fibrosis and impaired cardiac function.

317 Overall, the underlying mechanisms by which thyroid hormones influence the prognosis  
318 of heart failure are complex and multifaceted. Further research is needed to fully elucidate  
319 these mechanisms and to identify potential therapeutic targets for improving the outcomes of  
320 patients with heart failure.

### 321 **Limitations of the study**

322 This study has several limitations. It was a retrospective study and subject to biases  
323 inherent in such studies. Future directions for research Future research should explore the  
324 mechanisms by which FT3 affects the prognosis of patients with heart failure. Additionally,  
325 prospective studies with larger sample sizes and multiple centers are needed to validate our  
326 findings and determine the optimal cut-off value for FT3 in identifying high-risk patients.  
327 Finally, interventional studies are needed to investigate the effect of interventions to optimize  
328 FT3 levels on the prognosis of patients with heart failure.

### 329 **Clinical recommendations**

330 Based on our findings, it is recommended that clinicians assess FT3 levels in Hypertrophic  
331 cardiomyopathy patients with HFpEF, in addition to other established prognostic factors such  
332 as age, atrial fibrillation, and NT-proBNP. Patients with low FT3 levels should be closely  
333 monitored for adverse outcomes and may benefit from targeted interventions to improve their  
334 thyroid function. Additionally, our study highlights the importance of identifying and  
335 addressing potentially modifiable factors, such as thyroid dysfunction, in the management of  
336 Hypertrophic cardiomyopathy patients with HFpEF.



337 **Conclusion**

338 In conclusion, our study found that FT3 is an independent prognostic factor in Hypertrophic  
339 cardiomyopathy patients with HFpEF, and the non-linear predictive value of FT3 for  
340 prognosis is presented in an "L" shape, with a critical value of FT3=2.885. These findings are  
341 important for clinicians to identify high-risk patients and adjust treatment strategies  
342 accordingly. These findings have important implications for identifying high-risk patients  
343 who may benefit from early intervention and monitoring. Clinicians should consider  
344 measuring FT3 levels in patients with heart failure and monitoring them closely for adverse  
345 outcomes. Future research should explore the underlying mechanisms linking FT3 levels and  
346 adverse cardiovascular outcomes and evaluate the effectiveness of interventions aimed at  
347 improving thyroid hormone levels in patients with heart failure.

348 However, this study has several limitations, including the relatively small sample size,  
349 the lack of information on potential confounding factors, and the limited generalizability of  
350 the results. Future studies with larger sample sizes, more comprehensive data, and more  
351 diverse populations are needed to further validate our findings and explore the underlying  
352 mechanisms. Overall, our study highlights the importance of considering FT3 as a prognostic  
353 factor in Hypertrophic cardiomyopathy patients with HFpEF and provides new insights into  
354 the management of this condition.

355 **Consent for publication**

356 All authors have approved the final manuscript for publication.

357 **Availability of data and materials.**

358 Not applicable.

359 **Funding.**

360 This work was supported by: National Key R&D Program of China (2020YFC2004705), National  
361 Natural Science Foundation of China (81825003, 91957123, 82270376), CAMS Innovation Fund  
362 for Medical Sciences (2022-I2M-C&T-B-119, 2021-I2M-5-003), Beijing Nova Program from  
363 Beijing Municipal Science & Technology Commission(Z201100006820002), CSC Special Fund  
364 for Clinical Research (CSCF2021A04).

365 **Author Contributions.** X.B conducted statistical analyses and collaborated on drafting the  
366 manuscript. X.B, J.G, K.Z, W.X.L, W.Y.W, C.S and Y.D.T reviewed and edited the manuscript and  
367 contributed to the discussion. W.Y.W, C.S and Y.D.T. obtained funding, conceived the research,  
368 and drafted the manuscript. All authors approved the final version of the manuscript. X.B is the  
369 guarantor of this work and, as such, had full access to all of the data in the study and takes  
370 responsibility for the integrity of the data and the accuracy of the data analysis.

371 **Acknowledgments.**

372 The authors thank all the investigators and subjects who participated in this project.

373

374 **References :**

- 375 [1] Gerdes AM, Ojamaa K. Thyroid Hormone and Cardioprotection[J]. Compr Physiol,  
376 2016, 6(3): 1199-1219. doi: 10.1002/cphy.c150012
- 377 [2] Fukuyama K, Ichiki T, Imayama I, et al. Thyroid hormone inhibits vascular remodeling  
378 through suppression of cAMP response element binding protein activity[J]. Arterioscler  
379 Thromb Vasc Biol, 2006, 26(9): 2049-2055. doi:  
380 10.1161/01.ATV.0000233358.87583.01
- 381 [3] Wang JJ, Zhuang ZH, Shao CL, et al. Assessment of causal association between  
382 thyroid function and lipid metabolism: a Mendelian randomization study[J]. Chin Med J  
383 (Engl), 2021, 134(9): 1064-1069. doi: 10.1097/cm9.0000000000001505

- 384 [4] Wang WY, Tang YD, Yang M, et al. Free triiodothyronine level indicates the degree of  
385 myocardial injury in patients with acute ST-elevation myocardial infarction[J]. *Chin*  
386 *Med J (Engl)*, 2013, 126(20): 3926-3929. doi:  
387 10.3760/cma.j.issn.0366-6999.20130087
- 388 [5] Zhang K, Meng X, Wang W, et al. Prognostic Value of Free Triiodothyronine Level in  
389 Patients With Hypertrophic Obstructive Cardiomyopathy[J]. *J Clin Endocrinol Metab*,  
390 2018, 103(3): 1198-1205. doi: 10.1210/jc.2017-02386
- 391 [6] Wang W, Guan H, Gerdes AM, et al. Thyroid Status, Cardiac Function, and Mortality in  
392 Patients With Idiopathic Dilated Cardiomyopathy[J]. *J Clin Endocrinol Metab*, 2015,  
393 100(8): 3210-3218. doi: 10.1210/jc.2014-4159
- 394 [7] Dillmann W. Cardiac hypertrophy and thyroid hormone signaling[J]. *Heart Fail Rev*,  
395 2010, 15(2): 125-132. doi: 10.1007/s10741-008-9125-7
- 396 [8] Ojamaa K. Signaling mechanisms in thyroid hormone-induced cardiac hypertrophy[J].  
397 *Vascul Pharmacol*, 2010, 52(3-4): 113-119. doi: 10.1016/j.vph.2009.11.008
- 398 [9] Gersh BJ, Maron BJ, Bonow RO, et al. 2011 ACCF/AHA guideline for the diagnosis  
399 and treatment of hypertrophic cardiomyopathy: a report of the American College of  
400 Cardiology Foundation/American Heart Association Task Force on Practice  
401 Guidelines[J]. *Circulation*, 2011, 124(24): e783-831. doi:  
402 10.1161/CIR.0b013e318223e2bd
- 403 [10] Authors/Task Force m, Elliott PM, Anastakis A, et al. 2014 ESC Guidelines on  
404 diagnosis and management of hypertrophic cardiomyopathy: the Task Force for the  
405 Diagnosis and Management of Hypertrophic Cardiomyopathy of the European Society  
406 of Cardiology (ESC)[J]. *Eur Heart J*, 2014, 35(39): 2733-2779. doi:  
407 10.1093/eurheartj/ehu284
- 408 [11] Maron BJ, Desai MY, Nishimura RA, et al. Diagnosis and Evaluation of  
409 Hypertrophic Cardiomyopathy: JACC State-of-the-Art Review[J]. *J Am Coll Cardiol*,  
410 2022, 79(4): 372-389. doi: 10.1016/j.jacc.2021.12.002
- 411 [12] Chow SL, Maisel AS, Anand I, et al. Role of Biomarkers for the Prevention,  
412 Assessment, and Management of Heart Failure: A Scientific Statement From the  
413 American Heart Association[J]. *Circulation*, 2017, 135(22): e1054-e1091. doi:  
414 10.1161/cir.0000000000000490
- 415 [13] De Matteis G, Covino M, Burzo ML, et al. Prognostic role of hypothyroidism and low  
416 free-triiodothyronine levels in patients hospitalized with acute heart failure[J]. *Intern*  
417 *Emerg Med*, 2021, 16(6): 1477-1486. doi: 10.1007/s11739-020-02582-y

- 418 [14] Sato Y, Yoshihisa A, Kimishima Y, et al. Low T3 Syndrome Is Associated With High  
419 Mortality in Hospitalized Patients With Heart Failure[J]. *J Card Fail*, 2019, 25(3):  
420 195-203. doi: 10.1016/j.cardfail.2019.01.007
- 421 [15] Grais IM, Sowers JR. Thyroid and the heart[J]. *Am J Med*, 2014, 127(8): 691-698. doi:  
422 10.1016/j.amjmed.2014.03.009
- 423 [16] Cappola AR, Desai AS, Medici M, et al. Thyroid and Cardiovascular Disease  
424 Research Agenda for Enhancing Knowledge, Prevention, and Treatment[J].  
425 *Circulation*, 2019. doi: 10.1161/circulationaha.118.036859
- 426 [17] Yamakawa H, Kato TS, Noh JY, et al. Thyroid Hormone Plays an Important Role in  
427 Cardiac Function: From Bench to Bedside[J]. *Front Physiol*, 2021, 12: 606931. doi:  
428 10.3389/fphys.2021.606931
- 429 [18] Martinez F. Thyroid hormones and heart failure[J]. *Heart Fail Rev*, 2016, 21(4):  
430 361-364. doi: 10.1007/s10741-016-9556-5
- 431 [19] Borovac JA, D'Amario D, Bozic J, et al. Sympathetic nervous system activation and  
432 heart failure: Current state of evidence and the pathophysiology in the light of novel  
433 biomarkers[J]. *World J Cardiol*, 2020, 12(8): 373-408. doi: 10.4330/wjc.v12.i8.373
- 434

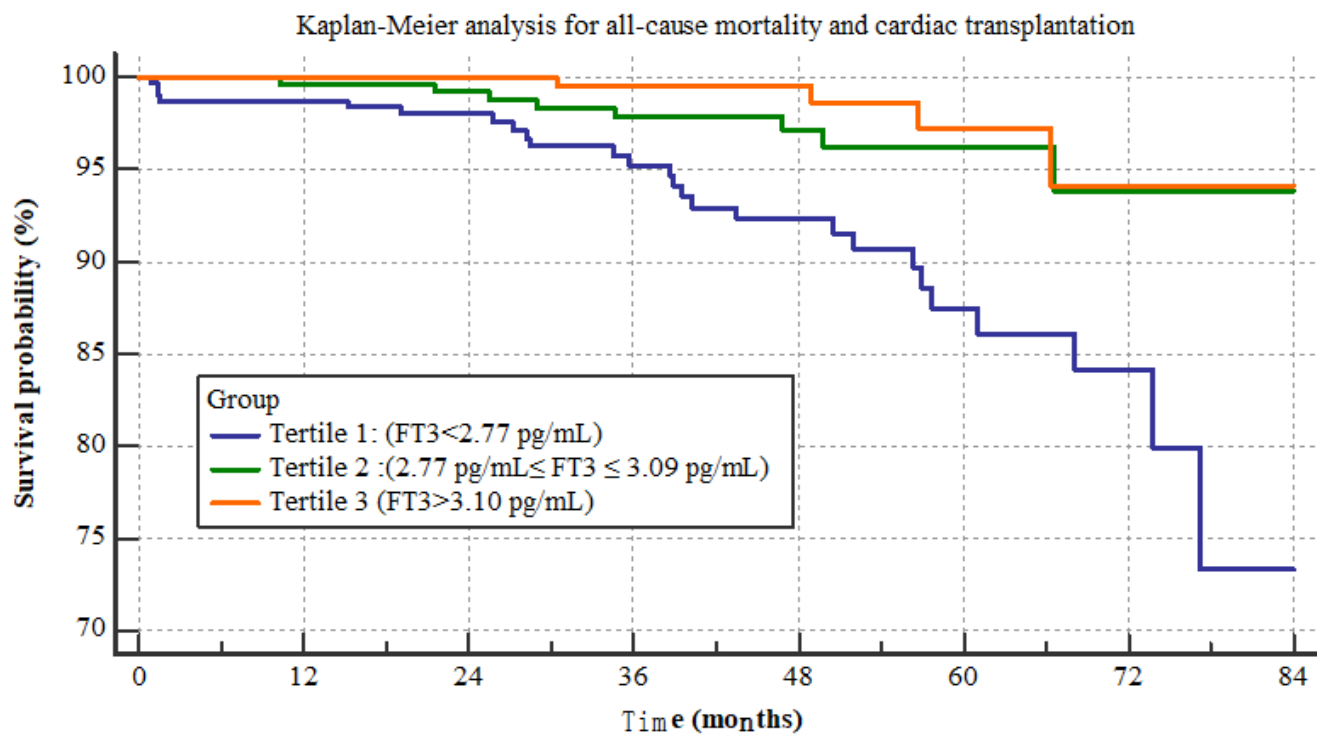

Number at risk

Group: Tertile 1: (FT3 < 2.77 pg/mL)

|     |     |     |     |     |    |    |   |
|-----|-----|-----|-----|-----|----|----|---|
| 336 | 295 | 242 | 183 | 124 | 64 | 28 | 1 |
|-----|-----|-----|-----|-----|----|----|---|

Group: Tertile 2: (2.77 pg/mL ≤ FT3 ≤ 3.09 pg/mL)

|     |     |     |     |     |    |    |   |
|-----|-----|-----|-----|-----|----|----|---|
| 335 | 293 | 240 | 185 | 121 | 65 | 28 | 1 |
|-----|-----|-----|-----|-----|----|----|---|

Group: Tertile 3: (FT3 > 3.10 pg/mL)

|     |     |     |     |     |    |    |   |
|-----|-----|-----|-----|-----|----|----|---|
| 321 | 285 | 239 | 169 | 111 | 59 | 23 | 3 |
|-----|-----|-----|-----|-----|----|----|---|

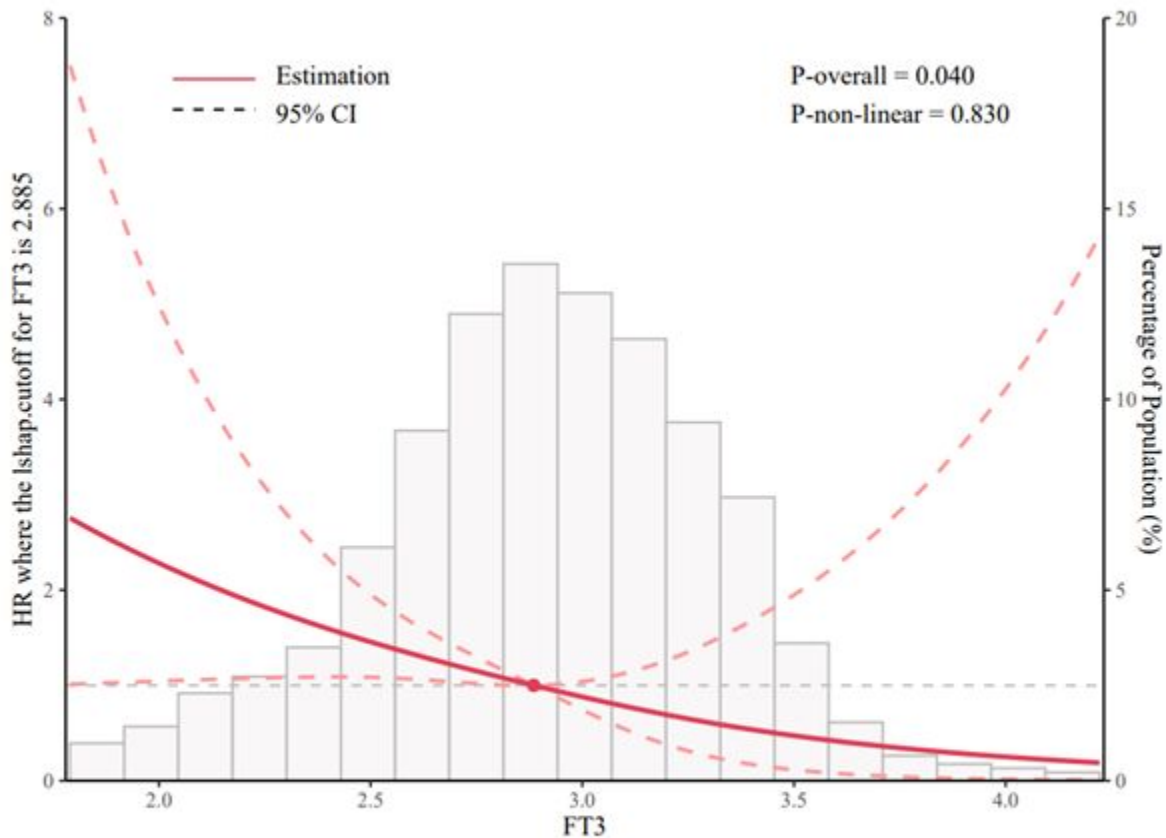

Fig2. Restricted Cubic Splines (RCS) of the relationship between the FT3 and the risk of all-cause mortality and cardiac transplantation.

**Table 1.** Baseline clinical characteristics of the study population divided into the three tertiles based on the level of FT3.

|                                                  | <b>Total<br/>(n=992)</b> | <b>Tertile 1<br/>(n=336)</b> | <b>Tertile 2<br/>(n=335)</b> | <b>Tertile 3<br/>(n=321)</b> | <b>P-value</b> |
|--------------------------------------------------|--------------------------|------------------------------|------------------------------|------------------------------|----------------|
| Age, y                                           | 53.60±13.83              | 57.21±13.84                  | 53.60±13.30                  | 50.00±13.49                  | <0.001         |
| Male, n (%)                                      | 577 (58.2%)              | 132 (39.3%)                  | 201 (60.0%)                  | 244 (76.0%)                  | <0.001         |
| BMI (kg/m <sup>2</sup> )                         | 25.42±4.25               | 25.01±3.59                   | 25.51±4.92                   | 25.72±4.07                   | 0.177          |
| Systolic BP (mmHg)                               | 121.58±18.47             | 122.17±18.06                 | 120.84±19.27                 | 121.79±18.05                 | 0.716          |
| Diastolic BP (mmHg)                              | 74.12±12.27              | 73.97±11.98                  | 74.01±13.15                  | 74.37±11.59                  | 0.927          |
| NT-proBNP (fmol/mL)                              | 2278.18±1743.44          | 2760.72±2024.43              | 2153.81±1610.95              | 1930.14±1454.51              | <0.001         |
| FT3 (pg/mL)                                      | 2.94±0.58                | 2.456±0.29                   | 2.93±0.09                    | 3.44±0.69                    | <0.001         |
| Atrial fibrillation, n (%)                       | 223 (22.5%)              | 55 (16.4%)                   | 21 (6.2%)                    | 31 (9.7%)                    | <0.001         |
| Non- sustained ventricular<br>tachycardia, n (%) | 52 (5.2%)                | 19 (5.7%)                    | 15 (4.5%)                    | 18(5.6%)                     | 0.742          |
| NYHA Class III or IV, n (%)                      | 128 (12.9%)              | 63 (18.8%)                   | 35 (10.4%)                   | 30 (9.4%)                    | <0.001         |
| Unexplained syncope, n (%)                       | 208(21.0%)               | 57(17.0%)                    | 91(27.2%)                    | 60(18.7%)                    | 0.002          |
| <b>Echocardiography</b>                          |                          |                              |                              |                              |                |
| Interventricular septal<br>thickness (mm)        | 20.23±5.19               | 19.51±4.86                   | 20.57±5.68                   | 20.56±4.90                   | 0.038          |
| LV end-diastolic diameter<br>(mm)                | 42.92±5.91               | 42.86±5.80                   | 42.64±6.33                   | 43.30±5.53                   | 0.464          |
| LV ejection fraction (%)                         | 64.55±6.10               | 63.97±6.58                   | 64.38±6.00                   | 65.30±5.65                   | 0.054          |

|                                           |             |             |             |             |       |
|-------------------------------------------|-------------|-------------|-------------|-------------|-------|
| LV outflow tract gradient, at rest (mmHg) | 51.00±13.42 | 46.17±15.48 | 52.73±12.59 | 53.96±12.29 | 0.090 |
| <b>Medications</b>                        |             |             |             |             |       |
| Beta-blocker, n (%)                       | 603 (60.8%) | 205 (61.0%) | 199 (59.4%) | 199 (61.9%) | 0.465 |
| ACEI/ARB, n (%)                           | 170 (17.1%) | 63 (18.8%)  | 60 (17.9%)  | 47 (14.6%)  | 0.449 |
| Diuretic, n (%)                           | 148 (19.0%) | 72 (21.4%)  | 55 (16.4%)  | 61 (19.0%)  | 0.120 |
| Calcium antagonist, n (%)                 | 205 (20.7%) | 84 (25.0%)  | 58 (17.3%)  | 63 (19.6%)  | 0.091 |

Values are mean ± SD or n (%).

Abbreviation: BMI, body mass index; NT-proBNP, N-terminal pro-brain natriuretic peptide; BP, blood pressure; NYHA, New York Heart Association; LV, left ventricle; ACEI/ARB, angiotensin-converting enzyme inhibitor/angiotensin receptor blocker.



**Table 2. Univariate Cox Analysis for All-Cause Mortality and Cardiac transplantation**

|                                        | <b>HR (95% CI)</b>   | <b>P value</b> |
|----------------------------------------|----------------------|----------------|
| FT3 (pg/mL)                            | 0.206 (0.106, 0.402) | <0.001         |
| Age, y                                 | 1.085(1.053, 1.118)  | <0.001         |
| Male, n (%)                            | 0.593(0.314, 1.122)  | 0.10.8         |
| NT-proBNP (per 100 fmol/mL)            | 1.026(1.015, 1.037)  | <0.001         |
| Atrial fibrillation, n (%)             | 4.240 (2.235, 8.044) | <0.001         |
| Unexplained syncope, n (%)             | 1.460(0.724, 2.944)  | 0.290          |
| Interventricular septal thickness (mm) | 1.001 (0.948, 1.056) | 0.980          |

Abbreviations are listed in Table 1.

**Table 3. Multivariate Cox Analysis for All-Cause Mortality and Cardiac transplantation**

|                                | Model 1              |         | Model 2              |         |
|--------------------------------|----------------------|---------|----------------------|---------|
|                                | HR (95% CI)          | P value | HR (95% CI)          | P value |
| Age, y                         | 1.062 (1.029, 1.096) | <0.001  | 1.040 (1.002, 1.079) | 0.037   |
| Atrial fibrillation            | 2.142 (1.084, 4.234) | 0.028   | 3.399 (1.356, 8.517) | 0.009   |
| NT-proBNP<br>(per 100 fmol/ml) | 1.021 (1.007, 1.035) | 0.003   | 1.023 (1.005,1.041)  | 0.012   |
| FT3 ((pg/mL)                   | 0.374 (0.178, 0.788) | 0.010   | --                   | --      |
| FT3 Tertial 3                  | --                   | --      | 1 (reference)        |         |
| FT3 Tertial 2                  | --                   | --      | 0.480 (0.214, 1.074) | 0.074   |
| FT3 Tertial 1                  | --                   | --      | 0.336(0.114, 0.988)  | 0.048   |

Multivariate Cox model selected by a stepwise method with factors that were significant in the univariate analysis and established risk factors for prognosis (age, Atrial fibrillation , NT-proBNP). Model 1 was constructed based on inclusion of FT3 as continuous variable; Model 2 was constructed based on inclusion of FT3 as Categorical variable.
